## Editorial: Impact of climate change on hydrology and water resources

The impact of climate change on water resources is a research area that is gaining prominence over time. Related research topics in this direction are the prediction of rainfall, temperature, streamflow/discharge, and other meteorological variables.

A special issue on the theme *Impact of Climate Change on Hydrology and Water Resources* is initiated to help researchers and other relevant stakeholders working in this area. This issue deals with estimation of runoff, floods and droughts, intensity-duration frequency (IDF) curves and evapotranspiration (ET). In addition, some of the miscellaneous topics related to hydrology are also part of the special issue. Brief but relevant information on the papers included in this issue is as follows.

Maciel da Silva *et al.* (2022) analyzed the possible impacts of climate change (CC) on the projections of the naturalized streamflows and affluent natural energy for the Brazil hydropower sector. They discussed the trends of the same for different regions. Supharatid *et al.* (2022) estimated changes in rainfall and temperature over mainland Southeast Asia by 18 models with two shared socioeconomic pathways (SSPs). They employed multi-model ensembles. A robust increase in precipitation is expected. They have suggested appropriate adaptation measures. These two papers considered the CMIP6 framework.

Grover *et al.* (2022) examined the effect of changes in temperature and precipitation on the Chenab basin, western Himalaya. They employed the Hydrologiska Byråns Vattenbalansavdelning (HBV) model for discharge computation. An increase in discharge is expected. Abdulahi *et al.* (2022) discussed the response of CC impact on future streamflow availability in the Upper Awash River basin, Ethiopia, using HBV. Streamflow is expected to increase. Ayalew *et al.* (2022) evaluated the impacts of CC on the Ribb catchment, Lake Tana Basin, Ethiopia. They used the Soil & Water Assessment Tool (SWAT). Future streamflow has decreased due to temperature increase and decrease in rainfall. Haleem *et al.* (2022) studied the effects of land-use change and CC in the upper Indus basin, Pakistan, and found that they impacted runoff depth. Yang *et al.* (2022) employed SWAT in the upper reaches of the Minjiang River to study the impact of CC. Results show that the runoff has a unique response to CC. Song *et al.* (2022) analyzed the effects of CC on surface water resources in China's upper Ganjiang River Basin. Temperature and runoff are projected to increase. All these papers considered the CMIP5 framework.

Takele *et al.* (2022) assessed the impacts of CC in the Upper Blue Nile basin. They employed SWAT and CORDEX data. Runoff is impacted due to CC. Kwakye & Bárdossy (2022) quantified the hydrological consequences of CC in a Black Volta catchment using flow duration curves. They employed HBV and CORDEX data. It is concluded that most of the rivers in the catchment are running dry for most of the year.

Hernández *et al.* (2022) found that CC impacts water quality. Zango *et al.* (2022) studied the effects of urbanization and CC in the Carp River watershed, Ottawa, Ontario. They employed SWAT for CMIP5 outputs. It is concluded that discharge will increase. Qin *et al.* (2022) studied the effects of environmental factors on the greenhouse gas change in the middle section of the Three Gorges Reservoir. Wu *et al.* (2022) studied the water environmental capacity of the Yongzhou Section of Xiangjiang River Basin. It was based on the SWAT-EFDC model. It is found to be helpful for this type of problem. Abbasi *et al.* (2022a) studied the effects of land-use changes and CC on green water security in Kashafrud Basin in the CMIP5 framework. They employed SWAT. Decrease in groundwater scarcity and vulnerability are predicted. Hussain *et al.* (2022) modelled the effects of land use and CC on the performance of the Al-Ameer district Storm Water Sewer System, Iraq. They employed SWMM. The effect of CC on the stormwater drainage system was more adverse than that due to land-use change.

Zhou (2022a) studied the segmentation of flood season and scheme optimization in the Yellow River. He opined that segmentation plays a major role in flood prevention. Shu *et al.* (2022) assessed the flood risk of Ya'an, Sichuan, China, based on the energy theory. The study provided a scientific framework for disaster relief initiatives. Laddimath *et al.* (2022) assessed the impacts of CC in CMIP5 framework on drought-prone areas in the Bhima sub-basin, India. They used Standard Precipitation Index (SPI). SPI showed changes over various RCPs. Zhang *et al.* (2022) studied ecological drought and its state assessment of the Yellow River estuary. It is concluded that studies of this nature are beneficial to reduce loss due to drought. Waseem *et al.* (2022) studied the impact of meteorological drought on maize crop production in Punjab, Pakistan.

Tayşi & Özger (2022) generated future IDF curves with short-duration rainfalls in CMIP5. Increases in short-duration rainfalls are expected. Yamoat *et al.* (2022) studied the temporal change of extreme precipitation in Thailand.

Wang *et al.* (2022a) discussed wetland ET in China's Sanmenxia Reservoir area. Wang *et al.* (2022b) employed Landsat images and the METRIC model to study ET.

Zhou *et al.* (2022) studied extreme precipitation variations in the Guangdong-Hong Kong-Macao Greater Bay area from 1961 to 2018. Sun *et al.* (2022) analyzed future precipitation variations in China's Yellow River Basin using deterministic and probabilistic projections. Samantaray & Ghose (2022) developed a hybrid technique integrating phase-space reconstruction with a firefly algorithm and support vector machine and used it to predict runoff. Tiwari *et al.* (2022) modelled runoff in the Kolar river basin, India, using a wavelet with an artificial neural network. They also used performance indicators for comparison. Yeditha *et al.* (2022) investigated the spatiotemporal characterization of streamflow of six unregulated catchments in India. They used global climate indices for the same. Pervin & Khan (2022) analyzed the variability and trends of climate extreme indices in Chattogram City, Bangladesh.

Tumsa (2022) assessed the performance of six bias correction methods for the upper Awash basin, Oromia, Ethiopia. Gong *et al.* (2022) felt that strong relationships between elasticity and most factors are observed. Zhou (2022b) made an urban water dissipation calculation. The methodology is applied to Zhengzhou, the capital city of Henan Province, China, and concluded that water dissipation inside a building could not be neglected. Kui-Feng *et al.* (2022) studied Holocene environmental evolution history in the Yellow River Delta. They propose a reconstruction of the Holocene environment using multi-proxy indices.

## ACKNOWLEDGMENTS

We are thankful to Prof D. Nagesh Kumar, Editor-in-Chief, Journal of Water and Climate Change, IWA Publishing and Ms. Emma Buckingham, Ms. Emma Gulseven, Ms. Natasha Healy of the editorial team, IWA Publishing for excellent support and co-ordination throughout this special issue.

### Guest Editors

#### Takeshi Takama

University of Udayana, Indonesia

#### Muhammad Bilal

School of Marine Sciences, Nanjing University of Information Science and Technology, Nanjing 210044, China

#### K. Srinivasa Raju

Birla Institute of Technology and Science Pilani, Hyderabad Campus, India

## REFERENCES

- Abbasi, A., Amirabadizadeh, M., Afshar, A. A. & Yaghoobzadeh, M. 2022 Potential influence of climate and land-use changes on green water security in a semi-arid catchment. *Journal of Water and Climate Change* **13** (1), 287–303. doi: <https://doi.org/10.2166/wcc.2021.055>.
- Abdulah, S. D., Abate, B., Harka, A. E. & Husen, S. B. 2022 Response of climate change impact on streamflow: the case of the Upper Awash sub-basin, Ethiopia. *Journal of Water and Climate Change* **13** (2), 607–628. doi: <https://doi.org/10.2166/wcc.2021.251>.
- Ayalew, D. W., Asefa, T., Moges, M. A. & Leyew, S. M. 2022 Evaluating the potential impact of climate change on the hydrology of Ribb catchment, Lake Tana Basin, Ethiopia. *Journal of Water and Climate Change* **13** (1), 190–205. doi: <https://doi.org/10.2166/wcc.2021.049>.
- Gong, X., Xu, A., Du, S. & Zhou, Y. 2022 Spatiotemporal variations in the elasticity of runoff to climate change and catchment characteristics with multi-timescales across the contiguous United States. *Journal of Water and Climate Change* **13** (3), 1408–1424. doi: <https://doi.org/10.2166/wcc.2022.242>.
- Grover, S., Tayal, S., Sharma, R. & Beldring, S. 2022 Effect of changes in climate variables on hydrological regime of Chenab basin, wes. Himalaya. *Journal of Water and Climate Change* **13** (1), 357–371. doi: <https://doi.org/10.2166/wcc.2021.003>.
- Haleem, K., Khan, A. U., Ahmad, S., Khan, M., Khan, F. A., Khan, W. & Khan, J. 2022 Hydrological impacts of climate and land-use change on flow regime variations in upper Indus basin. *Journal of Water and Climate Change* **13** (2), 758–770. doi: <https://doi.org/10.2166/wcc.2021.238>.
- Hernández, J. P. R., López, O. L. O., Pérez, P. T. G., Ortiz, F. G. G. & Gil, V. S. 2022 Perception of the inhabitants of the department of Caldas, Colombia on the effects of climate change on water quality. *Journal of Water and Climate Change* **13** (1), 43–55. doi: <https://doi.org/10.2166/wcc.2021.200>.

- Hussain, S. N., Zwain, H. M. & Nile, B. K. 2022 Modeling the effects of land-use and climate change on the performance of stormwater sewer system using SWMM simulation: case study. *Journal of Water and Climate Change* **13** (1), 125–138. doi: <https://doi.org/10.2166/wcc.2021.180>.
- Kui-Feng, W., Xue-Feng, Y., Jiang-Bao, X., Shu-Jian, X., Tai-Ping, Z., Yan, X. & Hong-Jun, Z. 2022 Holocene environmental evolution history based on sporopollenin and micropaleontological reconstruction of KY-01 in the Yellow River Delta. *Journal of Water and Climate Change* **13** (1), 206–223. doi: <https://doi.org/10.2166/wcc.2021.144>.
- Kwakye, S. O. & Bárdossy, A. 2022 Quantification of the hydrological consequences of climate change in a typical West African catchment using flow duration curves. *Journal of Water and Climate Change* **13** (1), 26–42. doi: <https://doi.org/10.2166/wcc.2021.147>.
- Laddimath, R. S., Patil, N. S., Rao, P. S. & Nagendra. 2022 Assessing the impacts of climate change on drought-prone regions in Bhima sub-basin (India) using the Standard Precipitation Index. *Journal of Water and Climate Change* **13** (2), 817–838. doi: <https://doi.org/10.2166/wcc.2021.195>.
- Maciel da Silva, M. V., da Silva Silveira, C., Cabral, S. L., Marcos, A. D., da Silva, G. K. & Lima, C. E. S. 2002 Naturalized streamflows and Affluent Natural Energy projections for the Brazilian hydropower sector for the SSP2-4.5 and SSP5-8.5 scenarios of the CMIP6. *Journal of Water and Climate Change* **13** (1), 315–336. doi: <https://doi.org/10.2166/wcc.2021.352>.
- Pervin, L. & Khan, M. S. K. 2022 Variability and trends of climate extremes indices from the observed and downscaled GCMs data over 1950–2020 period in Chattogram City, Bangladesh. *Journal of Water and Climate Change* **13** (2), 975–998. doi: <https://doi.org/10.2166/wcc.2021.331>.
- Qin, Y., Gou, Y., Yu, Z. & Tan, W. 2021 Effects of environmental factors on the methane and carbon dioxide fluxes at the middle of Three Gorges Reservoir. *Journal of Water and Climate Change* **12** (8), 4007–4020. doi: <https://doi.org/10.2166/wcc.2021.081>.
- Samantaray, S. & Ghose, D. K. 2022 Prediction of S12-MKII rainfall simulator experimental runoff data sets using hybrid PSR-SVM-FFA approaches. *Journal of Water and Climate Change* **13** (2), 707–734. doi: <https://doi.org/10.2166/wcc.2021.221>.
- Shu, X., Ren, Y., Duan, Z., Liu, X., Hua, X. & Lei, H. 2022 Flood risk assessment in Ya'an, Sichuan, China based on the emergy theory. *Journal of Water and Climate Change* **13** (1), 247–259. doi: <https://doi.org/10.2166/wcc.2021.133>.
- Song, P., Wang, C., Ding, G., Sun, J., Kong, L., Lu, M., Lei, X. & Wang, H. 2022 Evaluating the impact of climate change on surface water resources in the upper Ganjiang River Basin, China. *Journal of Water and Climate Change* **13** (3), 1462–1476. doi: <https://doi.org/10.2166/wcc.2022.258>.
- Sun, Z., Liu, Y., Zhang, J., Chen, H., Shu, Z., Guan, T., Wang, G., Jin, J., Bao, Z. & Liu, C. 2022 Deterministic and probabilistic projections and their credibility in analyzing future precipitation variations in the Yellow River Basin, China. *Journal of Water and Climate Change* **13** (2), 359–374. doi: <https://doi.org/10.2166/wcc.2022.359>.
- Supharatid, S., Nafung, J. & Aribarg, T. 2022 Projected changes in temperature and precipitation over mainland Southeast Asia by CMIP6 models. *Journal of Water and Climate Change* **13** (1), 337–356. doi: <https://doi.org/10.2166/wcc.2021.015>.
- Takele, G. S., Gebrie, G. S., Gebremariam, A. G. & Engida, A. N. 2022 Future climate change and impacts on water resources in the Upper Blue Nile basin. *Journal of Water and Climate Change* **13** (2), 908–925. doi: <https://doi.org/10.2166/wcc.2021.235>.
- Tayşi, H. & Özger, M. 2022 Disaggregation of future GCMs to generate IDF curves for the assessment of urban floods. *Journal of Water and Climate Change* **13** (2), 684–706. doi: <https://doi.org/10.2166/wcc.2021.241>.
- Tiwari, D. K., Tiwari, H. L. & Raman Nateriya, R. 2022 Runoff modeling in Kolar river basin using hybrid approach of wavelet with artificial neural network. *Journal of Water and Climate Change* **13** (2), 963–974. doi: <https://doi.org/10.2166/wcc.2021.246>.
- Tumsa, B. C. 2022 Performance assessment of six bias correction methods using observed and RCM data at upper Awash basin, Oromia, Ethiopia. *Journal of Water and Climate Change* **13** (2), 664–683. doi: <https://doi.org/10.2166/wcc.2021.181>.
- Wang, J., Li, H. & Lu, H. 2022a An estimation of the evapotranspiration of typical steppe areas using Landsat images and the METRIC model. *Journal of Water and Climate Change* **13** (2), 926–942. doi: <https://doi.org/10.2166/wcc.2021.432>.
- Wang, S., Liu, C., Tan, Y., Wang, J., Du, F., Han, Z., Jiang, Z. & Wang, L. 2022b Remote sensing inversion characteristic and driving factor analysis of wetland evapotranspiration in the Sanmenxia Reservoir area, China. *Journal of Water and Climate Change* **13** (3), 1599–1611. doi: <https://doi.org/10.2166/wcc.2021.247>.
- Waseem, M., Khurshid, T., Abbas, A., Ahmad, I. & Javed, Z. 2022 Impact of meteorological drought on agriculture production at different scales in Punjab, Pakistan. *Journal of Water and Climate Change* **13** (1), 113–124. doi: <https://doi.org/10.2166/wcc.2021.244>.
- Wu, L., Chen, Z., Ding, X., Liu, H.-y. & Wang, D.-q. 2022 Research on water environmental capacity accounting of the Yongzhou Section of Xiangjiang River Basin based on the SWAT-EFDC coupling model. *Journal of Water and Climate Change* **13** (2), 1106–1122. doi: <https://doi.org/10.2166/wcc.2021.319>.
- Yamoat, N., Hanchoo Wong, R., Sriboonlue, S. & A. Kangrang, A. 2022 Temporal change of extreme precipitation intensity–duration–frequency relationships in Thailand. *Journal of Water and Climate Change* **13** (2), 839–853. doi: <https://doi.org/10.2166/wcc.2021.348>.
- Yang, K., Chen, T., Ao, T., Zhang, X., Zhou, L. & Danyang Gao, D. 2022 Response of runoff in the upper reaches of the Minjiang River to climate change. *Journal of Water and Climate Change* **13** (1), 260–273. doi: <https://doi.org/10.2166/wcc.2021.038>.
- Yeditha, P. K., Pant, T., Rathinasamy, M. & Agarwal, A. 2022 Multi-scale investigation on streamflow temporal variability and its connection to global climate indices for unregulated rivers in India. *Journal of Water and Climate Change* **13** (2), 735–757. doi: <https://doi.org/10.2166/wcc.2021.189>.
- Zango, B.-S., Seidou, O., Sartaj, M., Nakhaei, N. & Stiles, K. 2022 Impacts of urbanization and climate change on water quantity and quality in the Carp River watershed. *Journal of Water and Climate Change* **13** (2), 786–816. doi: <https://doi.org/10.2166/wcc.2021.158>.

- Zhang, J., Liu, B., Yang, L., He, L., Cao, X. & Shao, G. 2022 Ecological drought and its state assessment: a case study in the Yellow River estuary. *Journal of Water and Climate Change* **13** (1), 13–25. doi: <https://doi.org/10.2166/wcc.2021.175>.
- Zhou, K. 2022a Flood season segmentation and scheme optimization in the Yellow River. *Journal of Water and Climate Change* **13** (1), 274–286. doi: <https://doi.org/10.2166/wcc.2021.110>.
- Zhou, K. 2022b Urban water dissipation calculation based on the improved water balance models. *Journal of Water and Climate Change* **13** (1), 372–382. doi: <https://doi.org/10.2166/wcc.2021.330>.
- Zhou, Y., Luo, Z., Li, S., Liu, Z., Shen, Y. & Zhuo, W. 2022 Temporal and spatial variations of extreme precipitation in the Guangdong-Hong Kong-Macao Greater Bay area from 1961 to 2018. *Journal of Water and Climate Change* **13** (1), 304–314. doi: <https://doi.org/10.2166/wcc.2021.078>.
